# Supplementary material
Source: PubMed Central journal article supplement (PMC3704107)
Supplement: Supp_Fig1.pdf [file Supp_Fig1.pdf]

## Supplementary Data

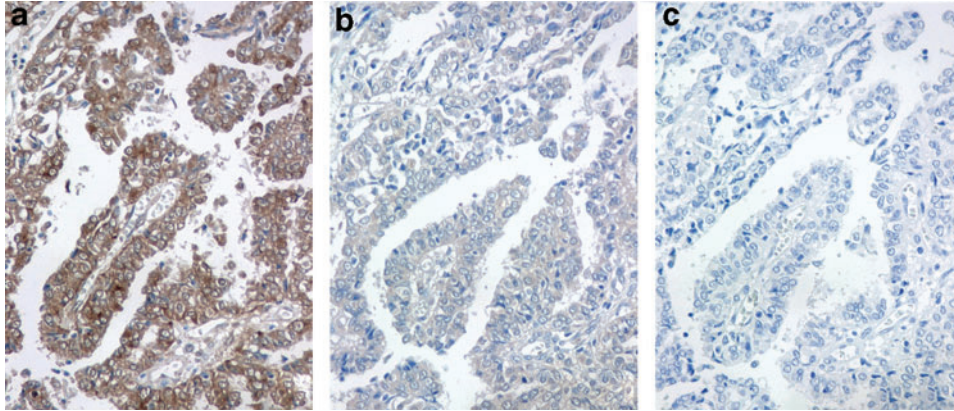

**SUPPLEMENTARY FIG. S1.** Antibody specificity testing in serial sections of PTC tissue,  $\times 600$ . **(a)** Intense FOXE1 staining by the unblocked antibody (1:50). **(b)** Partial loss of specific staining in the presence of 2 mg/mL of blocking peptide. **(c)** Complete absence of FOXE1 staining following antibody pre-adsorption with 5 mg/mL of blocking peptide.
