# Supplementary material
Source: PubMed Central journal article supplement (PMC3704107)
Supplement: Supp_Fig2.pdf [file Supp_Fig2.pdf]

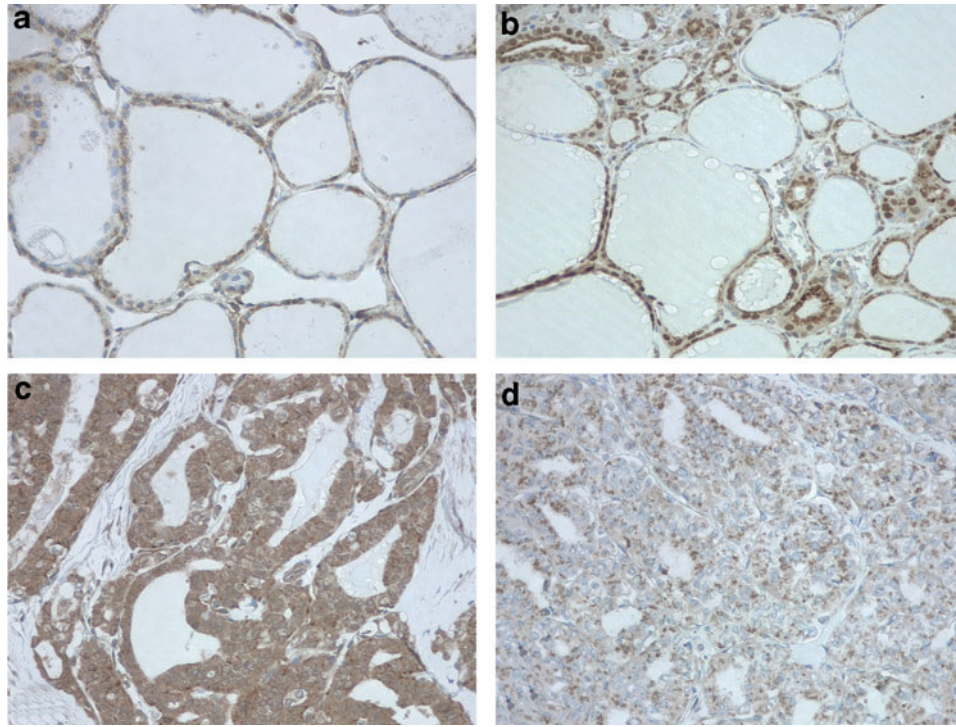

**SUPPLEMENTARY FIG. S2.** FOXE1 expression in different zones of normal thyroid (N) and tumor tissue (T), original magnification  $\times 200$ . **(a)** N distant, **(b)** N close, **(c)** T close, and **(d)** T distant zones.
